# Supplementary material for: Clinical Significance of Serum Biomarkers in Stage IV Non-Small-Cell Lung Cancer Treated with PD-1 Inhibitors: LIPI Score, NLR, dNLR, LMR, and PAB
Source: Hindawi journal article supplement (doi:10.1155/2022/7137357), 2022-07-30

### ROC of Indicators

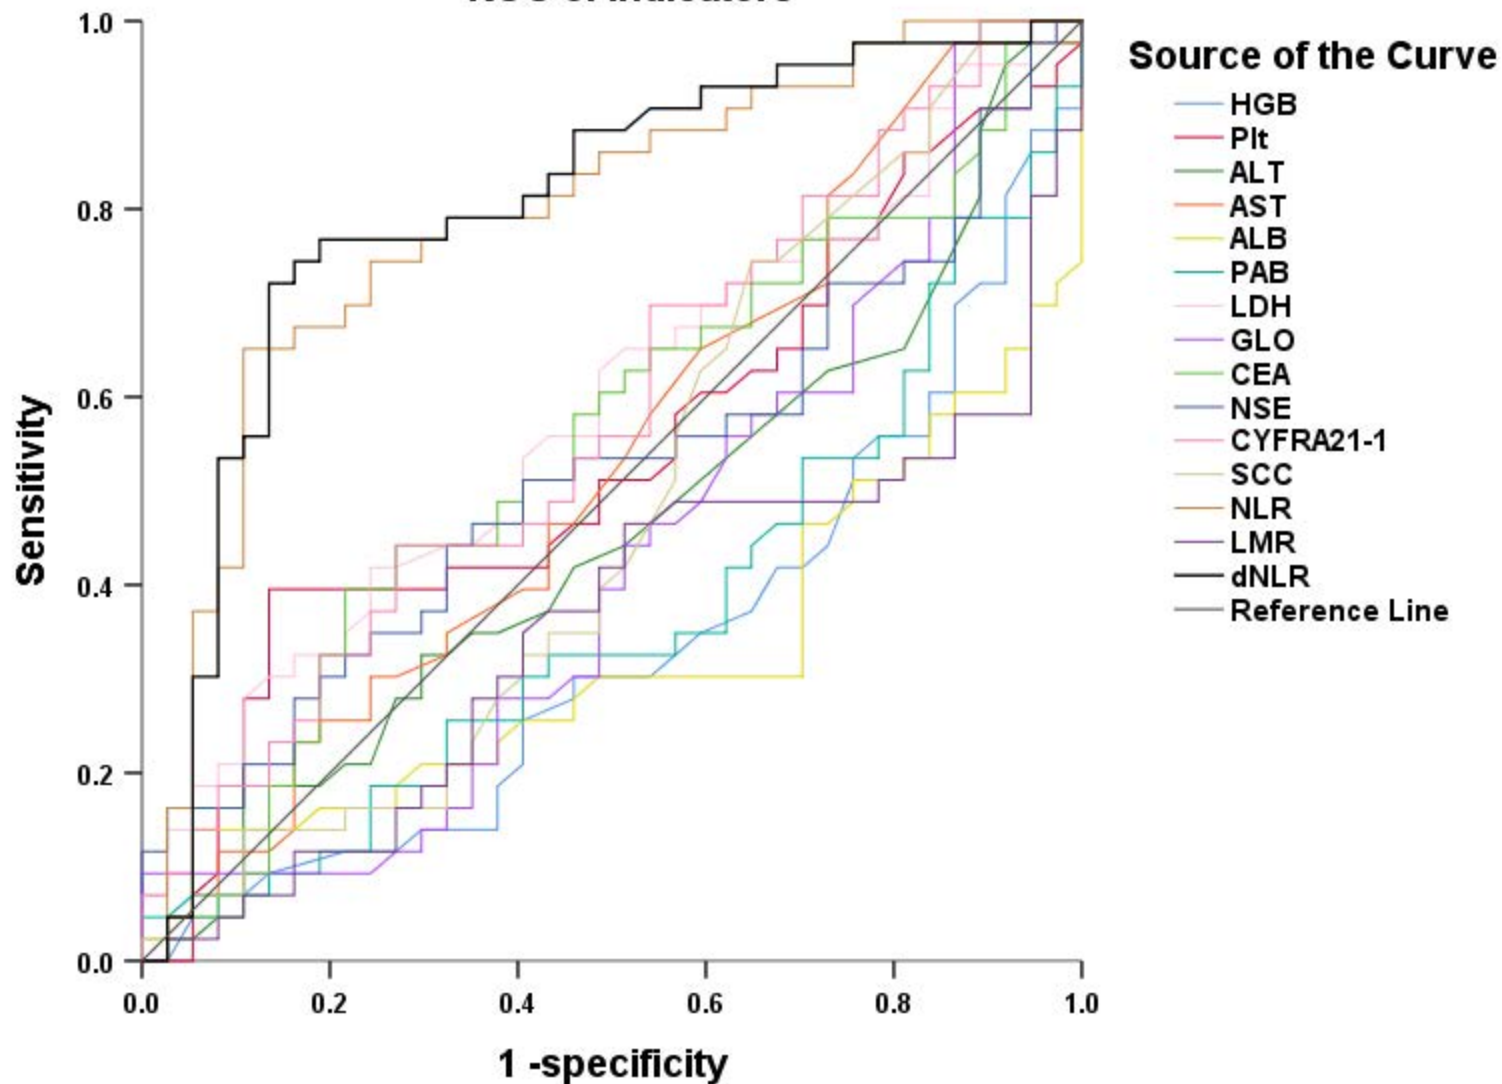

Supplement: f1 [file 7137357.f1.pdf]
